# Supplementary material for: Intraspecific Polymorphism, Interspecific Divergence, and the Origins of Function-Altering Mutations in Deer Mouse Hemoglobin
Source: PubMed Central journal article supplement — Mol Biol Evol. 2015 Jan 22;32(4):978–97. doi: 10.1093/molbev/msu403 (PMC4379404; doi:10.1093/molbev/msu403), 2015-01-22
Supplement: supp_msu403_Natarjan_et_al_Supplementary_Material.pdf [file supp_msu403_Natarjan_et_al_Supplementary_Material.pdf]

1 **Supplementary Material**

2

3 **Figure S1. Dot plots of sequence similarity between the globin gene clusters of *P. maniculatus* and *P.***  
4 ***leucopus*. A)** Pairwise comparisons of syntenic chromosomal regions containing the full complement of  
5  $\alpha$ -like globin genes, including the post-natally expressed *HBA* genes. The pattern of pairwise sequence  
6 matches provides evidence that the *HBA-T1* genes of both species are 1:1 orthologs, as are the  
7 pseudogenes at the 3' end of the clusters (*HBA-T3* in *P. maniculatus*, *HBA-T2* in *P. leucopus*). The fact  
8 that the majority of other *Peromyscus* species possess two duplicate *HBA* genes (see Fig. 3A) suggests  
9 that the ortholog of *P. maniculatus HBA-T2* was deleted in the common ancestor of *P. leucopus* and *P.*  
10 *gossypinus*. **B)** Pairwise comparisons of syntenic chromosomal regions containing the full complement of  
11  $\beta$ -like globin genes, including the post-natally expressed *HBB* genes. The pattern of pairwise sequence  
12 matches provides clear evidence for 1:1 orthology of the *HBB* gene pair in *P. maniculatus* and *P.*  
13 *leucopus*, an inference that is confirmed by phylogenetic reconstructions of downstream flanking  
14 sequence (see Fig. 6D).

15

16 **Figure S2 *Cytb* phylogeny showing that *P. maniculatus* specimens from northern California are**  
17 **distributed between two highly distinct clades.** Branch-tip symbols are color-coded according to  
18 geographic region. Clade 1 contains specimens from geographically disparate high-altitude localities  
19 across the western US (see Fig. 2 for the full phylogeny).

20

21 **Figure S3 Alignment of *HBA-T1* (A) and *HBA-T2* (B) amino acid sequences of *P. maniculatus***  
22 **specimens from Humboldt Co., CA.** The sequence logo above each alignment shows site-specific  
23 patterns of allele frequency variation in the *HBA-T1* and *HBA-T2* paralogs of *P. maniculatus* specimens  
24 from all other sampled localities. The sequence differences that distinguish the two *HBA* paralogs of the  
25 Humboldt mice are segregating as allelic variants in mice from other regions.

26

27 **Figure S4 Maximum likelihood phylogenies depicting relationships among the *HBA* genes of**  
28 ***Peromyscus* species.** Phylogeny reconstructions were based on four discrete data partitions: (A)  
29 5' flanking region (upstream), (B) the complete coding sequence (cds), (C) intron 2, and (D) 3' flanking  
30 region (downstream). All four phylogenies show the characteristic pattern of concerted evolution where  
31 paralogs from the same species group together to the exclusion of positional orthologs in other species.  
32 Gene conversion among the *HBA* paralogs has been sufficiently extensive that phylogenetic  
33 reconstructions are not informative about orthologous relationships.

34

35 **Figure S5 Alignment of *HBB-T1* (A) and *HBB-T2* (B) amino acid sequences of *P. maniculatus***  
36 **specimens from San Luis Obispo Co., CA.** The sequence logo above each alignment shows site-specific  
37 patterns of allele frequency variation in the *HBB-T1* and *HBB-T2* paralogs of *P. maniculatus* specimens  
38 from all other sampled localities. The fixed difference at  $\beta 135$  that distinguishes *HBB-T1* and *HBB-T2* of  
39 the San Luis Obispo mice is an allelic polymorphism in both *HBB* paralogs of mice from other regions.

40  
41 **Figure S6 Variation in the allosteric regulation of Hb-O<sub>2</sub> affinity within *P. maniculatus* and among**  
42 **different *Peromyscus* species.** Sensitivity to allosteric effectors is indexed by the difference in log-  
43 transformed  $P_{50}$  values measured for stripped Hb samples in the presence and absence of Cl<sup>-</sup> ions and  
44 DPG.  $\Delta \log-P_{50(\text{KCl-str})}$  measures Cl<sup>-</sup> sensitivity,  $\Delta \log-P_{50(\text{DPG-str})}$  measures DPG sensitivity, and  $\Delta \log-$   
45  $P_{50(\text{[KCl+DPG]-str})}$  measures sensitivity to both effectors together. *P. maniculatus* population samples are  
46 abbreviated as follows: A, Humboldt Co., CA; B, San Luis Obispo Co, CA; C, Mono Co., CA; D, Clear  
47 Creek Co., CO; and E, Yuma Co., CO.

48  
49 **Table S1** Specimens of *Peromyscus* used in the survey of polymorphism in the *HBA-T1*, *HBA-T2*, *HBB-*  
50 *T1*, and *HBB-T2* globin genes.

51 **Table S2** Interparalog divergence between the tandemly linked *HBA-T1* and *HBA-T2* genes of *P.*  
52 *maniculatus* and *P. keeni*.

53  
54 **Table S3** Interparalog divergence between the tandemly linked *HBB-T1* and *HBB-T2* genes of *P.*  
55 *maniculatus*, *P. keeni*, and *P. leucopus*.

56  
57 **Table S4** Estimates of genetic variances for functional properties of naturally occurring Hb variants in *P.*  
58 *maniculatus*.

59  
60 **Table S5** Trait-specific genetic variances for 21 amino acid polymorphisms in the *HBA* and *HBB* genes of  
61 *P. maniculatus*.

A)

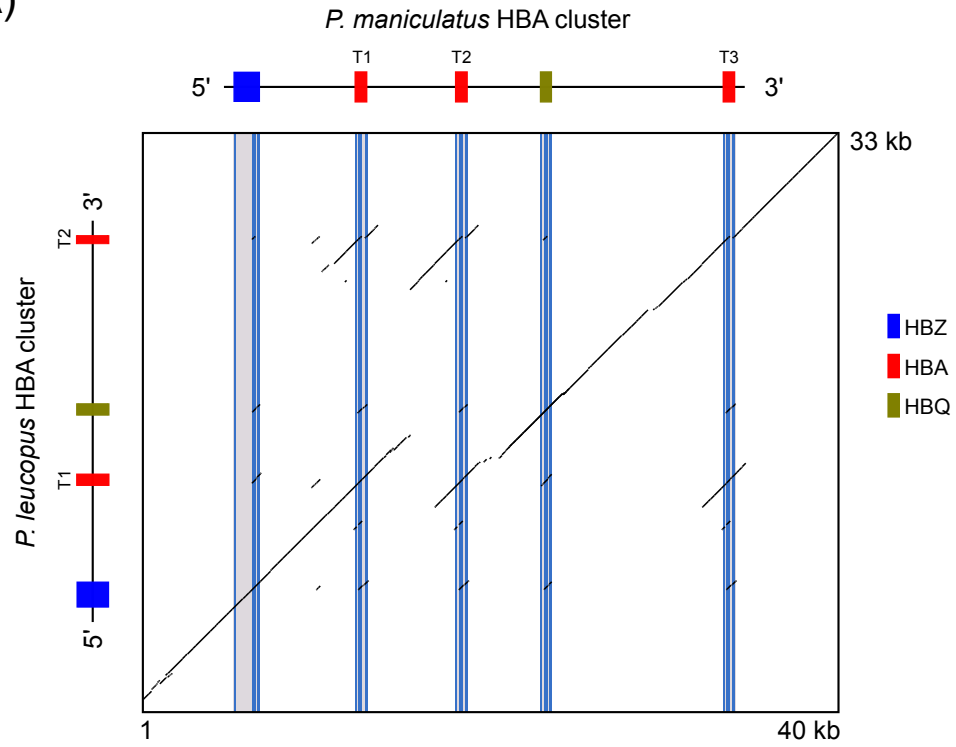

B)

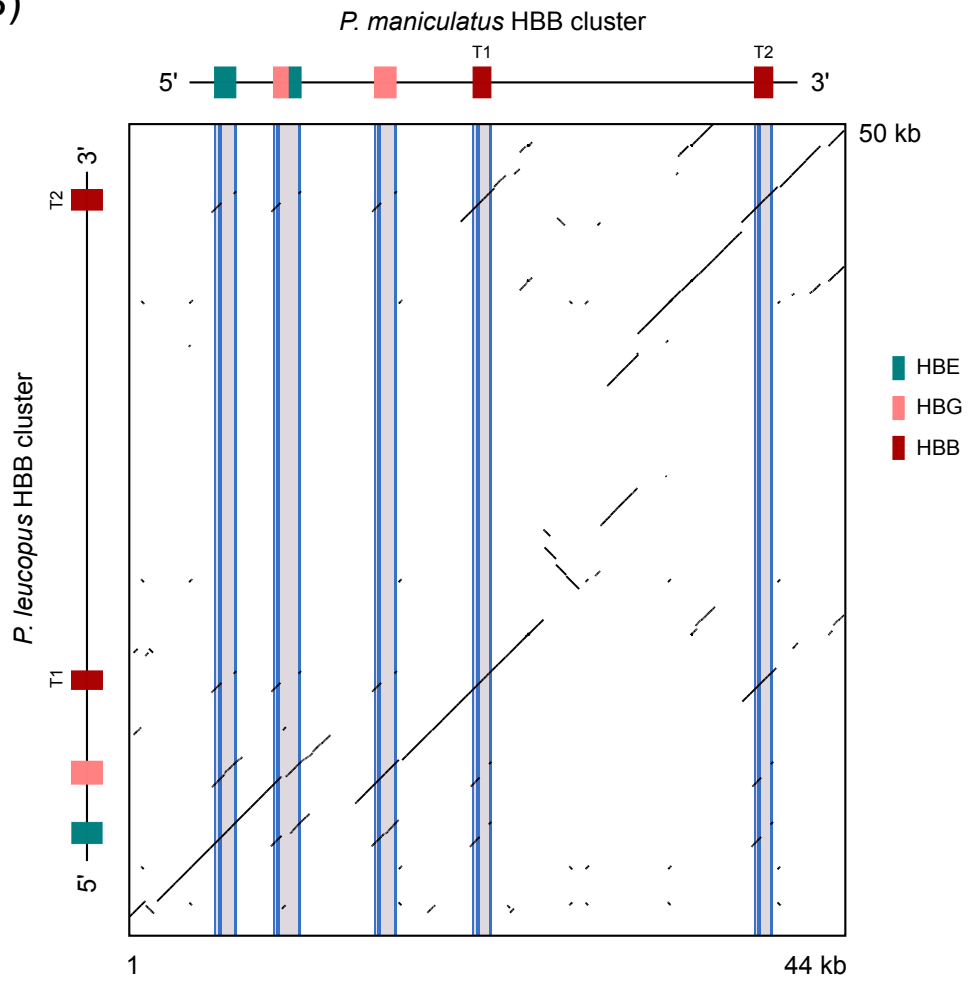

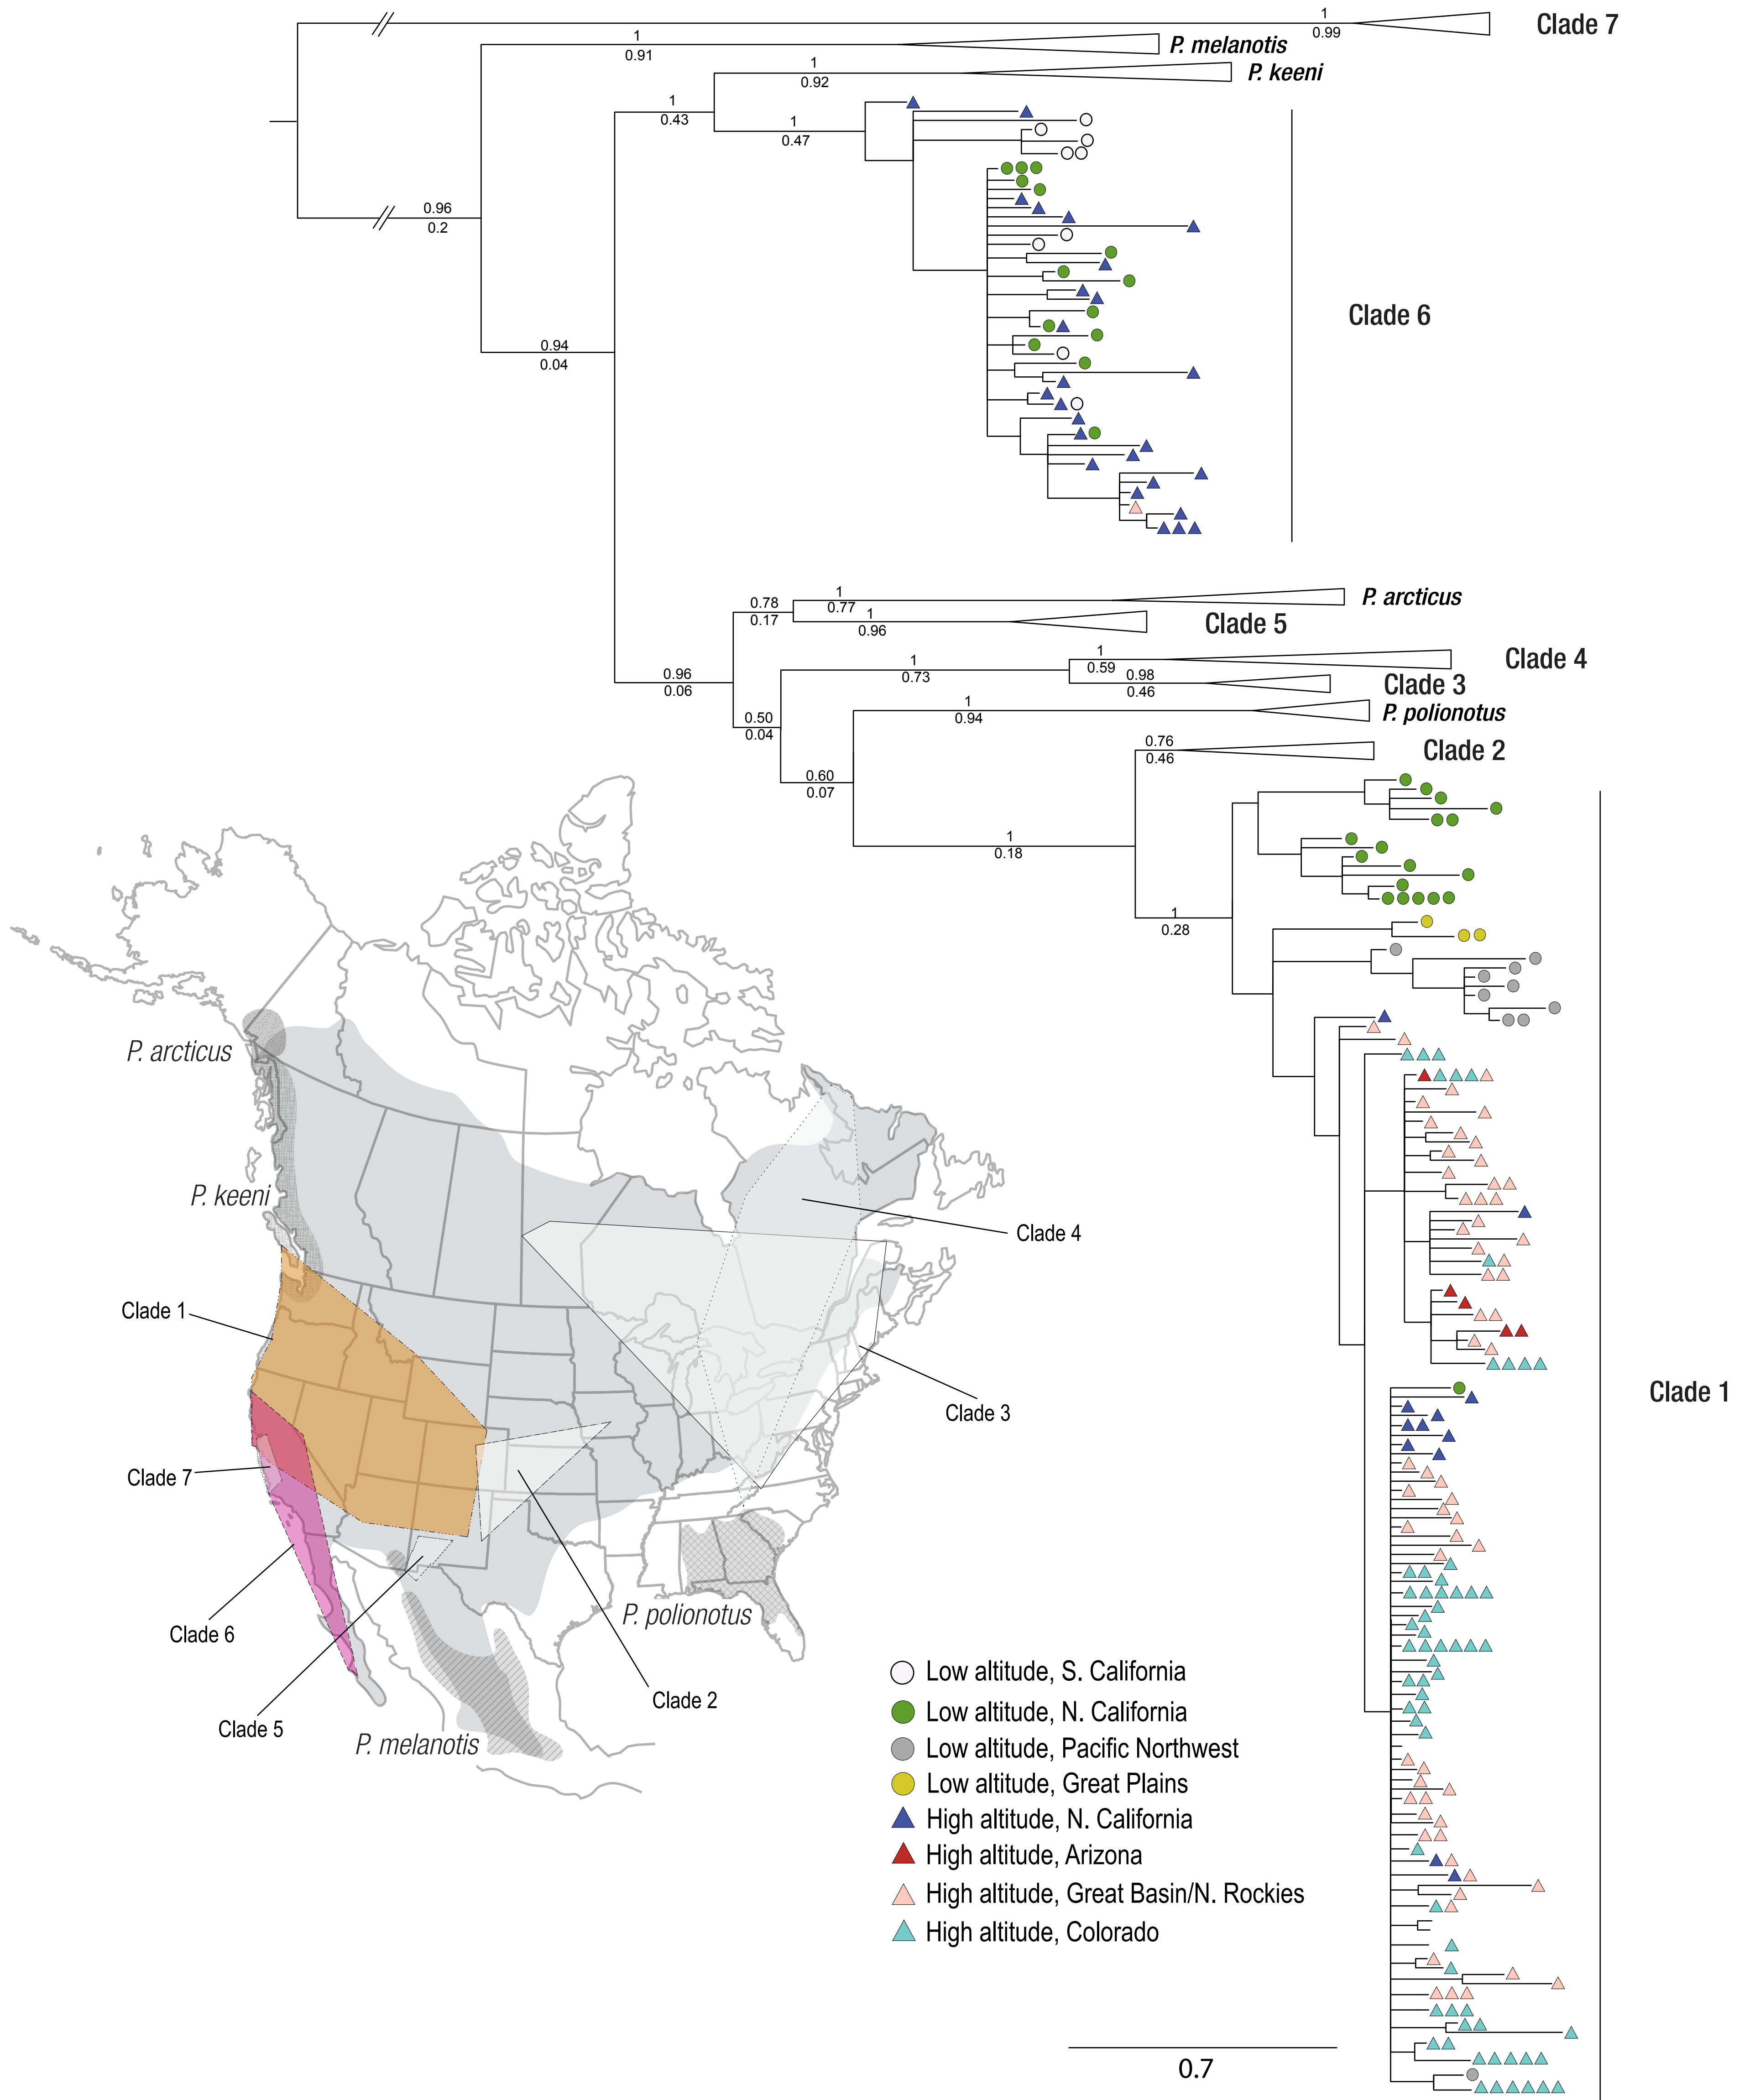

**A) HBA-T1**

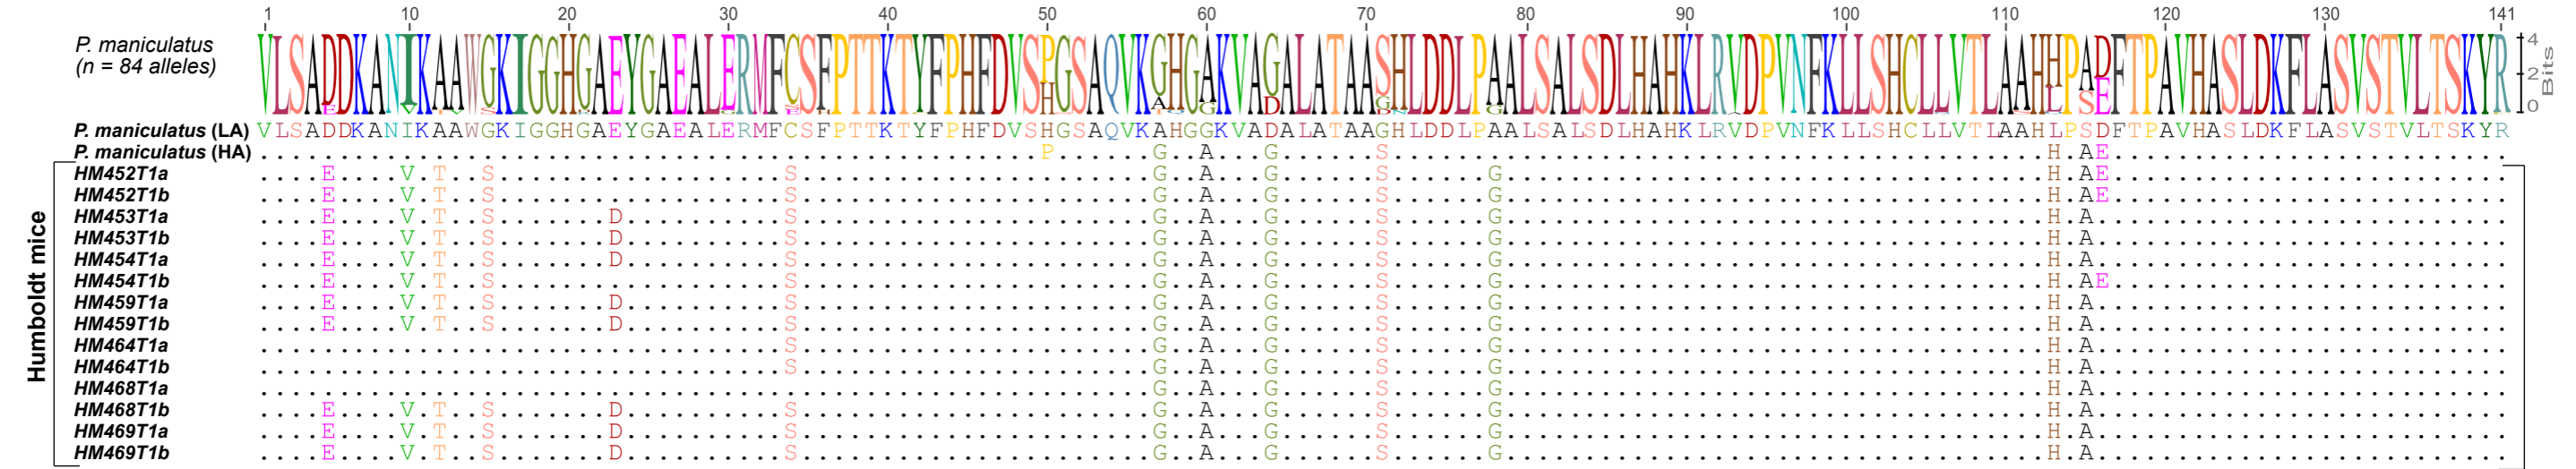

**B) HBA-T2**

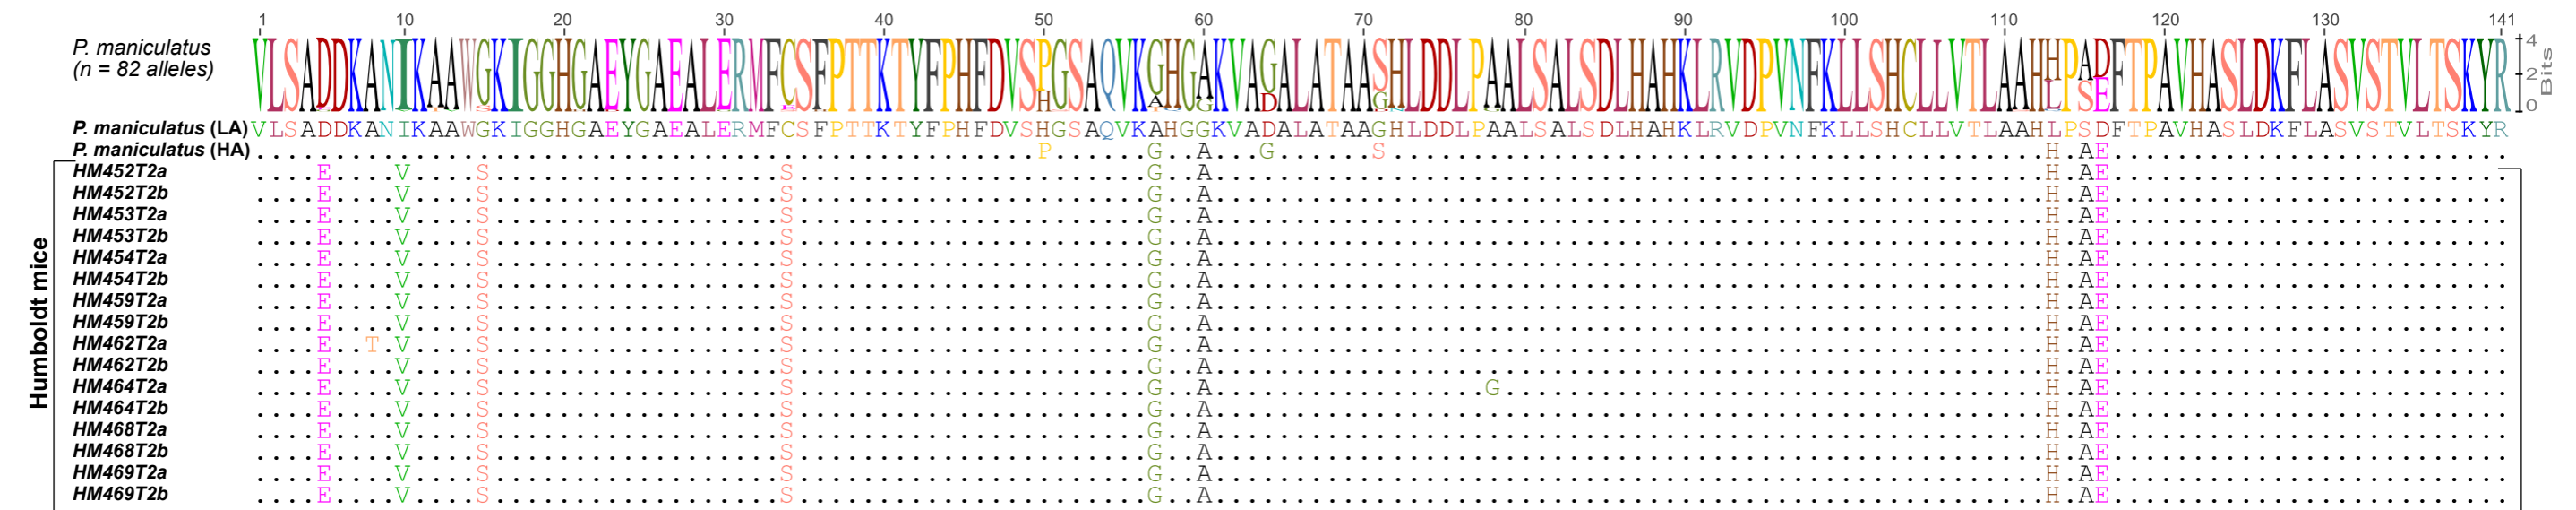

A) upstream

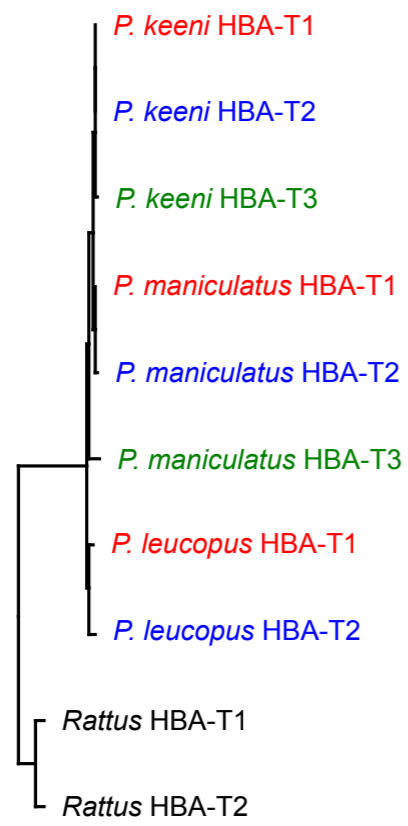

B) CDS

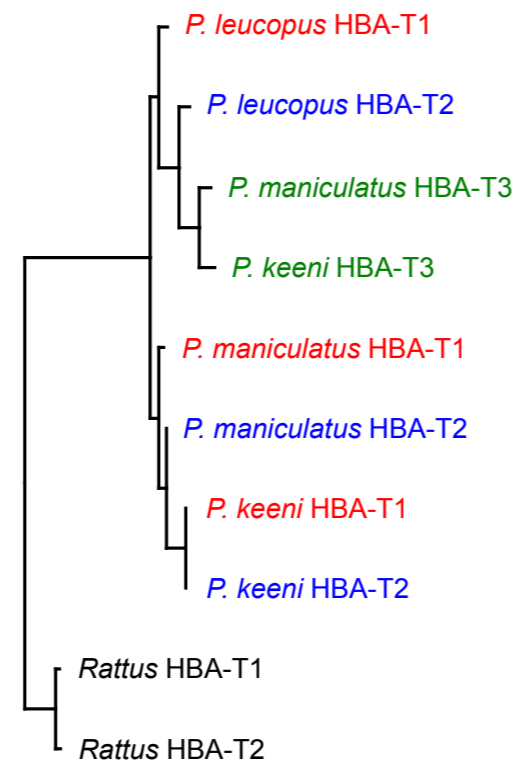

C) intron 2

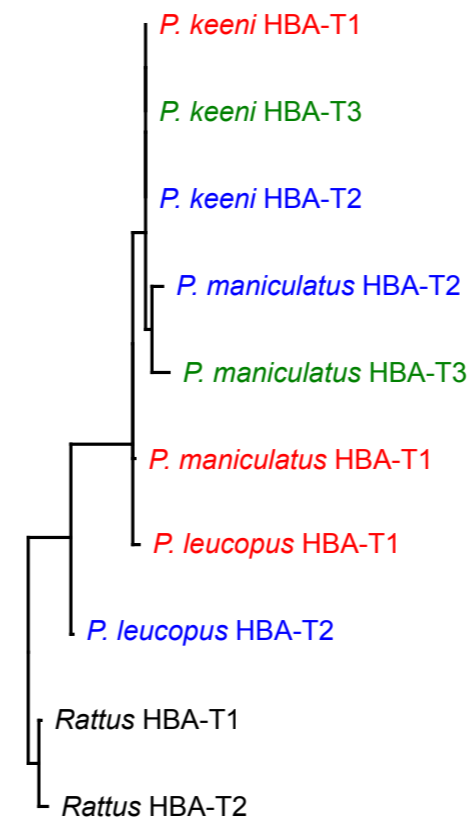

D) downstream

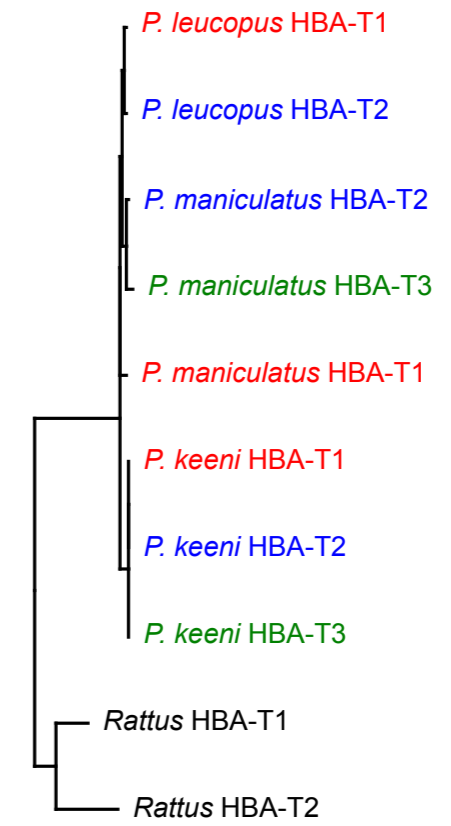

**A) HBB-T1**

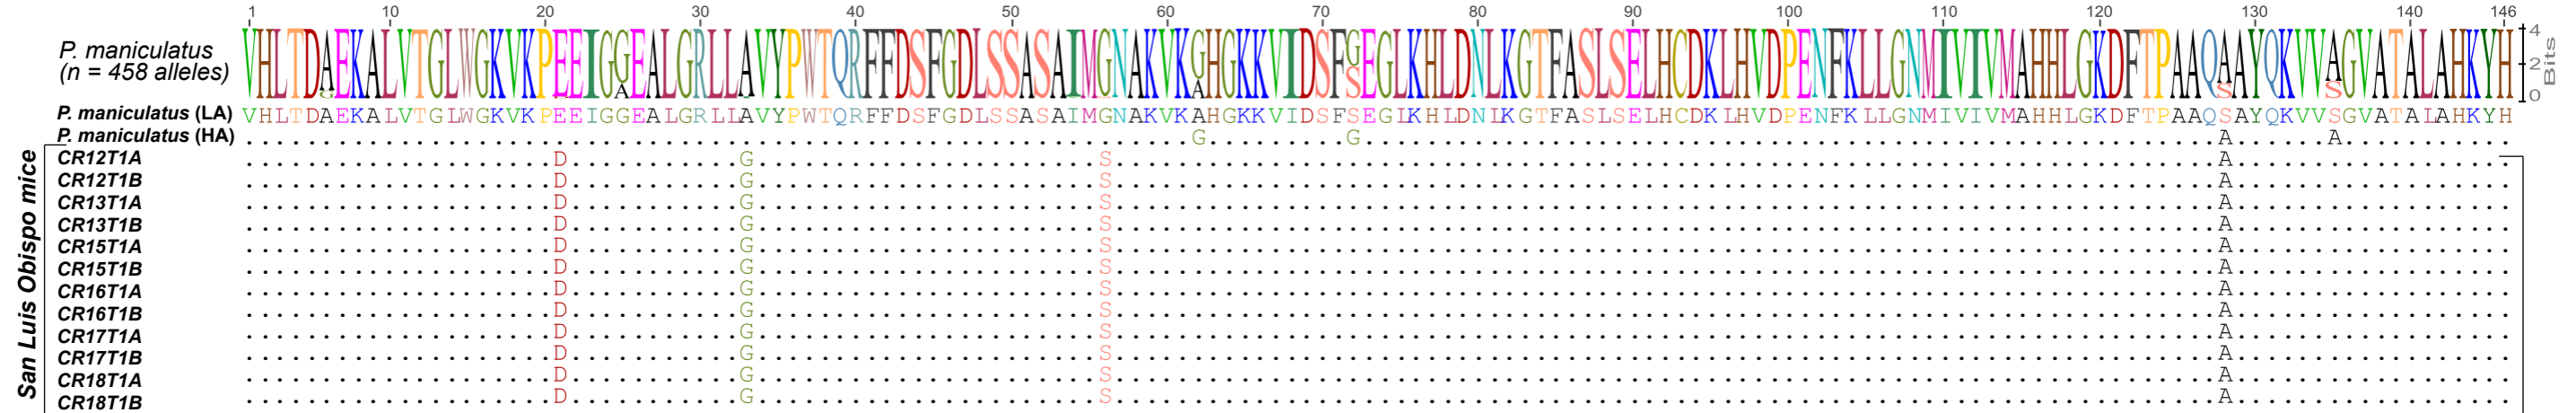

**B) HBB-T2**

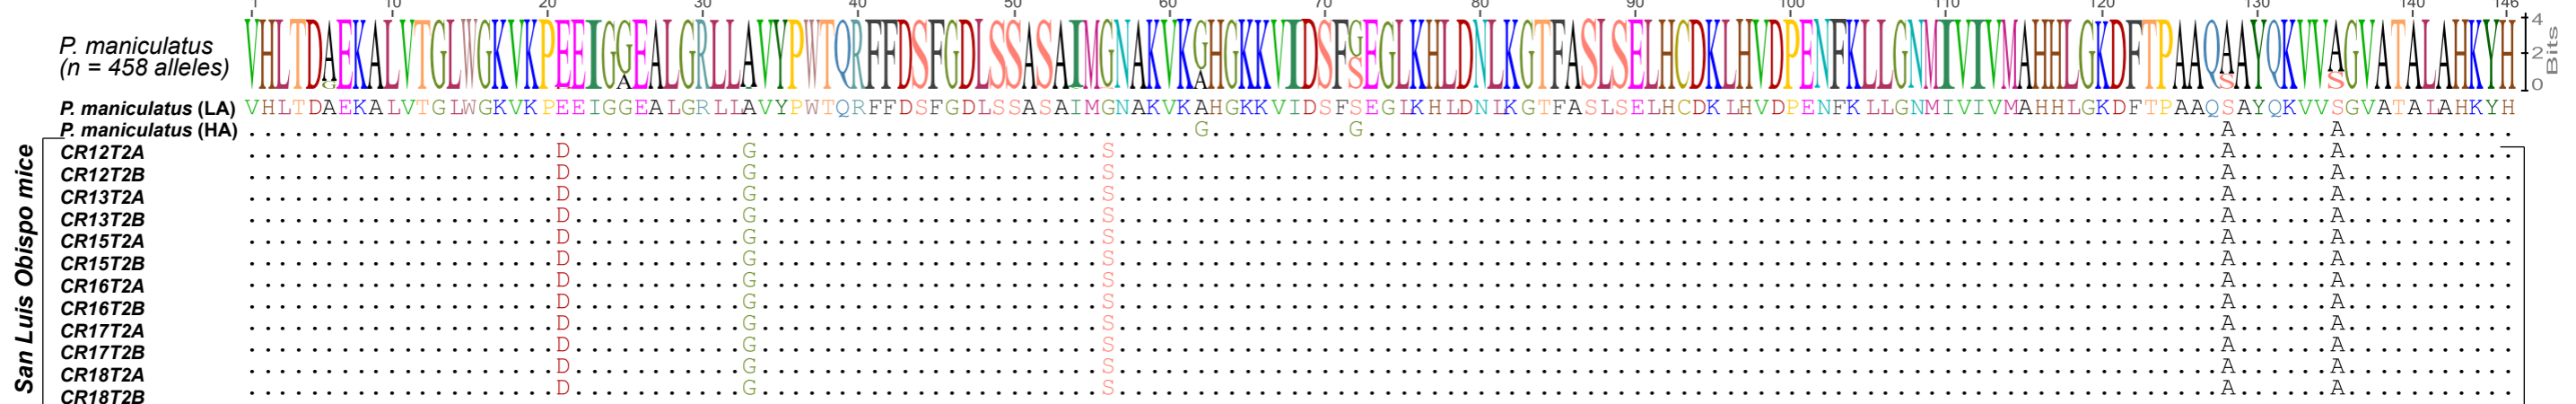

*P. maniculatus* A (n=4)

*P. maniculatus* B (n=6)

*P. maniculatus* C (n=4)

*P. maniculatus* D (n=20)

*P. maniculatus* E (n=15)

*P. keeni* (n=4)

*P. polionotus* (n=2)

*P. leucopus* (n=2)

*P. aztecus* (n=2)

*P. melanophrys* (n=2)

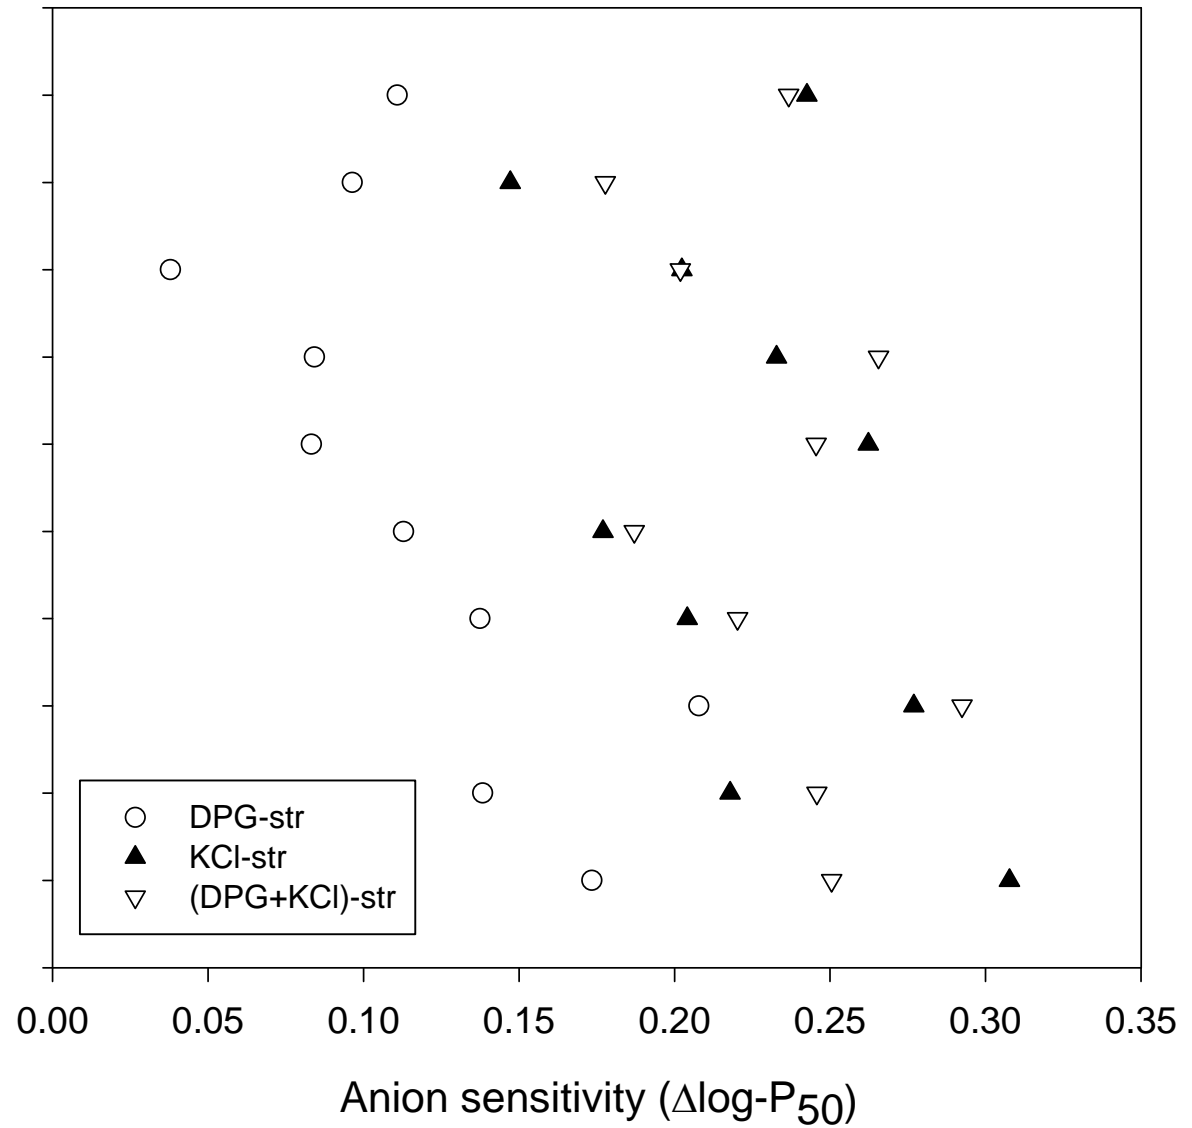



Table S1. Specimens of *Peromyscus* used in the survey of polymorphism in the *HBA-T1*, *HBA-T2*, *HBB-T1*, and *HBB-T2* globin genes. Population samples of *P. maniculatus* are numbered in accordance with the map of collection localities shown in fig. 1A.

| Species               | County/borough, state<br>(number of individual mice) | Locality                                   | Coordinates    | Elevation (m) |
|-----------------------|------------------------------------------------------|--------------------------------------------|----------------|---------------|
| <i>P. maniculatus</i> | 1. Humboldt Co., CA ( <i>n</i> =8)                   | vicinity of Arcata                         | 40.87, -124.08 | 38            |
|                       | 2. Marin Co., CA ( <i>n</i> =5)                      | Point Reyes National Seashore              | 38.07, -122.81 | 12            |
|                       | 3. Monterey Co., CA ( <i>n</i> =5)                   | Hastings Natural History Reservation       | 36.60, -121.90 | 8             |
|                       | 4. San Luis Obispo Co., CA ( <i>n</i> =6)            | Camp Roberts                               | 35.78, -120.79 | 208           |
|                       | 5. Merced Co., CA ( <i>n</i> =6)                     | vicinity of Snelling                       | 37.51, -120.40 | 99            |
|                       | 6. Tuolumne Co., CA ( <i>n</i> =6)                   | Upper Lyell Canyon, Yosemite National Park | 37.78, -119.26 | 3006          |
|                       | 7. Mariposa Co., CA ( <i>n</i> =6)                   | Lake Vogelsang, Yosemite National Park     | 37.79, -119.35 | 3134          |
|                       | 8. Mono Co., CA ( <i>n</i> =8)                       | White Mountain Peak, White Mountains       | 37.63, -118.26 | 3800          |
|                       | 9. White Pine Co., NV ( <i>n</i> =5)                 | Mt. Washington, South Snake Range          | 38.90, -114.30 | 3315          |
|                       | 10. Coconino Co., AZ ( <i>n</i> =6)                  | Humphreys Peak, San Francisco Peaks        | 35.35, -111.68 | 3500          |
|                       | 11. Wayne Co., UT ( <i>n</i> =5)                     | Boulder Mountain, Aquarius Plateau         | 38.17, -111.54 | 3260          |
|                       | 12. Clear Creek Co., CO ( <i>n</i> =38)              | Mt. Evans, Colorado Front Range            | 39.66, -105.60 | 4347          |
|                       | 13. Yuma Co., CO ( <i>n</i> =26)                     | Bonny Lake State Park                      | 39.62, -102.17 | 1158          |
|                       | 14. Pawnee Co., KS ( <i>n</i> =6)                    | Larned National Monument                   | 38.19, -99.22  | 620           |
|                       | 15. Lancaster Co., NE ( <i>n</i> =12)                | Nine-Mile Prairie                          | 40.87, -96.81  | 406           |
| <i>P. keeni</i>       | Wrangell Borough, AK ( <i>n</i> =7)                  | Wrangell Island                            | 56.39, -132.09 | 21            |
| <i>P. leucopus</i>    | Saunders Co., NE ( <i>n</i> =11)                     | Lee G. Simmons Conservation Park           | 41.04, -96.37  | 332           |

Table S2. Interparalog divergence between the tandemly linked *HBA-T1* and *HBA-T2* genes of *P. maniculatus* and *P. keeni*. Divergence data are from population samples in which both alleles of the *HBA-T1* and *HBA-T2* genes were separately cloned and sequenced. Data from *P. leucopus* are not included here because this species possesses a single adult-expressed  $\alpha$ -globin gene, *HBA-T1*.  $k$ , average number of nucleotide differences between the two paralogs;  $D_{xy}$  = average number of nucleotide substitutions per site between paralogs;  $D_a$  = number of net nucleotide substitutions per site between paralogs;  $K_S$  = nucleotide divergence at silent sites (Jukes-Cantor corrected).

| Population            | Length (bp) <sup>a</sup> | $N$ | No. fixed differences | No. shared polymorphisms | $k$   | $D_{xy}$ | $D_a$ | $K_S$ |
|-----------------------|--------------------------|-----|-----------------------|--------------------------|-------|----------|-------|-------|
| <i>P. maniculatus</i> |                          |     |                       |                          |       |          |       |       |
| Humboldt Co., CA      | 1495                     | 32  | 7                     | 24                       | 52.69 | 0.035    | 0.020 | 0.042 |
| Mono Co., CA          | 1402                     | 32  | 0                     | 114                      | 65.71 | 0.047    | 0.014 | 0.043 |
| Clear Creek Co., CO   | 1362                     | 68  | 0                     | 119                      | 40.96 | 0.030    | 0.005 | 0.031 |
| Yuma Co., CO          | 1354                     | 68  | 0                     | 193                      | 65.70 | 0.049    | 0.003 | 0.056 |
| <i>P. keeni</i>       |                          |     |                       |                          |       |          |       |       |
| Wrangell Island, AK   | 1453                     | 24  | 0                     | 0                        | 8.667 | 0.006    | 0.001 | 0.015 |

<sup>a</sup>Excluding alignment gaps.

Table S3. Interparalog divergence between the tandemly linked *HBB-T1* and *HBB-T2* genes of *P. maniculatus*, *P. keeni*, and *P. leucopus*. Divergence data are from population samples in which both alleles of the *HBB-T1* and *HBB-T2* genes were separately cloned and sequenced.  $k$ , average number of nucleotide differences between the two paralogs;  $D_{xy}$  = average number of nucleotide substitutions per site between paralogs;  $D_a$  = number of net nucleotide substitutions per site between paralogs;  $K_S$  = nucleotide divergence at silent sites (Jukes-Cantor corrected).

| Population              | Length (bp) <sup>a</sup> | $N$ | No. fixed differences | No. shared polymorphisms | $k$    | $D_{xy}$ | $D_a$  | $K_S$  |
|-------------------------|--------------------------|-----|-----------------------|--------------------------|--------|----------|--------|--------|
| <i>P. maniculatus</i>   |                          |     |                       |                          |        |          |        |        |
| Humboldt Co., CA        | 1241                     | 32  | 15                    | 13                       | 36.66  | 0.0295   | 0.0188 | 0.0401 |
| Marin Co., CA           | 1277                     | 20  | 0                     | 47                       | 36.13  | 0.0283   | 0.0060 | 0.0378 |
| Monterey Co., CA        | 1265                     | 20  | 0                     | 77                       | 110.54 | 0.0874   | 0.0102 | 0.0973 |
| San Luis Obispo Co., CA | 1291                     | 24  | 28                    | 0                        | 28.08  | 0.0218   | 0.0217 | 0.0284 |
| Merced Co., CA          | 1154                     | 24  | 0                     | 512                      | 134.79 | 0.1168   | 0.0028 | 0.1172 |
| Tuolumne Co, CA         | 1251                     | 24  | 12                    | 35                       | 95.43  | 0.0763   | 0.0172 | 0.0884 |
| Mariposa Co., CA        | 1266                     | 24  | 0                     | 39                       | 43.15  | 0.0341   | 0.0139 | 0.0451 |
| Mono Co., CA            | 1211                     | 32  | 0                     | 52                       | 39.47  | 0.0326   | 0.0113 | 0.0441 |
| White Pine Co., NV      | 1259                     | 20  | 10                    | 18                       | 46.27  | 0.0368   | 0.0172 | 0.0497 |
| Coconino Co., AZ        | 1268                     | 20  | 0                     | 27                       | 35.34  | 0.0279   | 0.0075 | 0.0377 |
| Wayne Co., UT           | 1253                     | 18  | 18                    | 20                       | 42.43  | 0.0339   | 0.0185 | 0.0462 |
| Clear Creek Co., CO     | 1115                     | 56  | 0                     | 26                       | 29.01  | 0.0260   | 0.0078 | 0.0363 |
| Yuma Co., CO            | 1113                     | 60  | 1                     | 39                       | 28.07  | 0.0252   | 0.0106 | 0.0342 |
| Pawnee Co., KS          | 1281                     | 20  | 47                    | 3                        | 56.33  | 0.0440   | 0.0395 | 0.0590 |
| <i>P. keeni</i>         |                          |     |                       |                          |        |          |        |        |
| Wrangell Island, AK     | 1195                     | 24  | 13                    | 0                        | 42.33  | 0.0354   | 0.0199 | 0.0423 |
| <i>P. leucopus</i>      |                          |     |                       |                          |        |          |        |        |
| Saunders Co., NE        | 1243                     | 20  | 15                    | 15                       | 33.53  | 0.0270   | 0.0176 | 0.0366 |

<sup>a</sup>Excluding alignment gaps.

Table S4. Estimates of trait-specific genetic variances and heritabilities ( $h^2$ ) for the pooled sample of Hb variants in *P. maniculatus*.

|                                           | Posterior mean of genetic variance | Posterior mean of $h^2$ (95% CI) |
|-------------------------------------------|------------------------------------|----------------------------------|
| $P_{50(\text{stripped})}$                 | 0.21                               | 0.27 (0.03-0.66)                 |
| $P_{50(+KCl)}$                            | 0.49                               | 0.23 (0.02-0.62)                 |
| $P_{50(+DPG)}$                            | 0.36                               | 0.32 (0.04-0.76)                 |
| $P_{50(KCl+DPG)}$                         | 0.41                               | 0.22 (0.02-0.61)                 |
| $\Delta\log-P_{50(KCl\text{-str})}$       | 0.34                               | 0.28 (0.03-0.76)                 |
| $\Delta\log-P_{50(DPG\text{-str})}$       | 1.05                               | 0.72 (0.25-0.94)                 |
| $\Delta\log-P_{50([KCl+DPG]\text{-str})}$ | 0.39                               | 0.33 (0.04-0.76)                 |

Table S5. Trait-specific genetic variances for 21 amino acid polymorphisms in the *HBA* and *HBB* genes of *P. maniculatus*. The association analysis did not include three *HBB* sites that were polymorphic in the species as a whole ( $\beta$ 21,  $\beta$ 33, and  $\beta$ 56), as these three sites were monomorphic in the set of phenotyped specimens. Biochemical phenotypes include  $P_{50}$  values under four experimental treatments, and measures of sensitivity to allosteric effectors (see *Materials and Methods* for details).

| Site         | $P_{50(\text{stripped})}$ | $P_{50(+KCl)}$       | $P_{50(+DPG)}$       | $P_{50(KCl+DPG)}$    | $\Delta\log-P_{50(KCl\text{-}str)}$ | $\Delta\log-P_{50(DPG\text{-}str)}$ | $\Delta\log-P_{50(KCl+DPG\text{-}str)}$ |
|--------------|---------------------------|----------------------|----------------------|----------------------|-------------------------------------|-------------------------------------|-----------------------------------------|
| $\alpha$ 5   | $1.44\times 10^{-4}$      | $1.57\times 10^{-4}$ | $8.39\times 10^{-4}$ | $2.65\times 10^{-4}$ | $5.94\times 10^{-4}$                | $2.22\times 10^{-3}$                | $9.63\times 10^{-4}$                    |
| $\alpha$ 10  | $3.53\times 10^{-4}$      | $9.17\times 10^{-8}$ | $5.40\times 10^{-4}$ | $5.12\times 10^{-4}$ | $2.30\times 10^{-4}$                | $3.37\times 10^{-3}$                | $2.68\times 10^{-3}$                    |
| $\alpha$ 12  | $1.67\times 10^{-4}$      | $3.17\times 10^{-5}$ | $8.72\times 10^{-4}$ | $2.84\times 10^{-4}$ | $2.73\times 10^{-4}$                | $1.12\times 10^{-2}$                | $1.45\times 10^{-3}$                    |
| $\alpha$ 15  | $2.39\times 10^{-4}$      | $6.97\times 10^{-5}$ | $1.54\times 10^{-3}$ | $5.44\times 10^{-4}$ | $5.04\times 10^{-4}$                | $2.32\times 10^{-2}$                | $2.60\times 10^{-3}$                    |
| $\alpha$ 23  | $1.62\times 10^{-4}$      | $4.00\times 10^{-5}$ | $8.90\times 10^{-4}$ | $3.09\times 10^{-4}$ | $2.86\times 10^{-4}$                | $1.20\times 10^{-2}$                | $1.47\times 10^{-3}$                    |
| $\alpha$ 34  | $2.82\times 10^{-4}$      | $6.49\times 10^{-5}$ | $1.75\times 10^{-3}$ | $5.28\times 10^{-4}$ | $4.95\times 10^{-4}$                | $2.42\times 10^{-2}$                | $2.71\times 10^{-3}$                    |
| $\alpha$ 50  | $1.60\times 10^{-5}$      | $4.28\times 10^{-4}$ | $2.86\times 10^{-3}$ | $2.02\times 10^{-4}$ | $7.82\times 10^{-4}$                | $4.96\times 10^{-3}$                | $4.08\times 10^{-4}$                    |
| $\alpha$ 57  | $1.07\times 10^{-4}$      | $3.35\times 10^{-4}$ | $6.99\times 10^{-5}$ | $2.73\times 10^{-5}$ | $1.13\times 10^{-4}$                | $2.54\times 10^{-7}$                | $6.04\times 10^{-6}$                    |
| $\alpha$ 60  | $1.17\times 10^{-4}$      | $3.57\times 10^{-4}$ | $6.25\times 10^{-5}$ | $2.92\times 10^{-5}$ | $1.20\times 10^{-4}$                | $3.29\times 10^{-7}$                | $5.91\times 10^{-6}$                    |
| $\alpha$ 64  | $2.34\times 10^{-4}$      | $3.84\times 10^{-7}$ | $5.31\times 10^{-4}$ | $3.44\times 10^{-4}$ | $1.80\times 10^{-4}$                | $4.68\times 10^{-3}$                | $1.60\times 10^{-3}$                    |
| $\alpha$ 71  | $1.27\times 10^{-3}$      | $1.03\times 10^{-3}$ | $3.87\times 10^{-5}$ | $1.79\times 10^{-4}$ | $6.69\times 10^{-6}$                | $5.10\times 10^{-4}$                | $2.00\times 10^{-4}$                    |
| $\alpha$ 78  | $7.27\times 10^{-4}$      | $1.91\times 10^{-4}$ | $2.53\times 10^{-6}$ | $7.33\times 10^{-7}$ | $3.34\times 10^{-5}$                | $5.48\times 10^{-4}$                | $4.15\times 10^{-4}$                    |
| $\alpha$ 113 | $1.55\times 10^{-3}$      | $8.73\times 10^{-4}$ | $1.16\times 10^{-4}$ | $3.88\times 10^{-6}$ | $1.57\times 10^{-6}$                | $8.71\times 10^{-4}$                | $1.05\times 10^{-3}$                    |
| $\alpha$ 115 | $1.45\times 10^{-3}$      | $7.81\times 10^{-4}$ | $9.31\times 10^{-5}$ | $9.44\times 10^{-8}$ | $6.04\times 10^{-6}$                | $1.00\times 10^{-3}$                | $1.17\times 10^{-3}$                    |
| $\alpha$ 116 | $4.04\times 10^{-4}$      | $3.95\times 10^{-7}$ | $3.38\times 10^{-7}$ | $6.05\times 10^{-5}$ | $4.30\times 10^{-4}$                | $6.45\times 10^{-6}$                | $6.83\times 10^{-5}$                    |
| $\beta$ 6    | $1.27\times 10^{-6}$      | $1.75\times 10^{-3}$ | $1.55\times 10^{-4}$ | $9.82\times 10^{-5}$ | $5.03\times 10^{-3}$                | $3.73\times 10^{-4}$                | $9.13\times 10^{-5}$                    |
| $\beta$ 25   | $1.48\times 10^{-5}$      | $1.32\times 10^{-5}$ | $1.43\times 10^{-5}$ | $1.82\times 10^{-5}$ | $4.89\times 10^{-6}$                | $1.89\times 10^{-5}$                | $8.83\times 10^{-6}$                    |
| $\beta$ 62   | $5.39\times 10^{-5}$      | $1.31\times 10^{-3}$ | $7.20\times 10^{-4}$ | $2.10\times 10^{-4}$ | $8.53\times 10^{-4}$                | $3.92\times 10^{-4}$                | $6.66\times 10^{-5}$                    |
| $\beta$ 72   | $6.57\times 10^{-5}$      | $1.60\times 10^{-3}$ | $9.03\times 10^{-4}$ | $2.39\times 10^{-4}$ | $1.02\times 10^{-3}$                | $4.88\times 10^{-4}$                | $9.84\times 10^{-5}$                    |
| $\beta$ 128  | $6.04\times 10^{-5}$      | $9.74\times 10^{-4}$ | $8.99\times 10^{-4}$ | $8.96\times 10^{-5}$ | $5.97\times 10^{-4}$                | $1.09\times 10^{-3}$                | $1.23\times 10^{-5}$                    |
| $\beta$ 135  | $2.71\times 10^{-5}$      | $7.50\times 10^{-4}$ | $1.09\times 10^{-3}$ | $1.83\times 10^{-5}$ | $4.85\times 10^{-4}$                | $2.24\times 10^{-3}$                | $1.38\times 10^{-6}$                    |
| median       | $1.62\times 10^{-4}$      | $3.35\times 10^{-4}$ | $5.40\times 10^{-4}$ | $1.79\times 10^{-4}$ | $2.86\times 10^{-4}$                | $1.00\times 10^{-3}$                | $4.08\times 10^{-4}$                    |
